# Supplementary material
Source: PubMed Central journal article supplement (PMC1829386)
Supplement: 7601626s1.pdf [file 7601626s1.pdf]

Bellavia, D. et al \_ Suppl. Fig.1

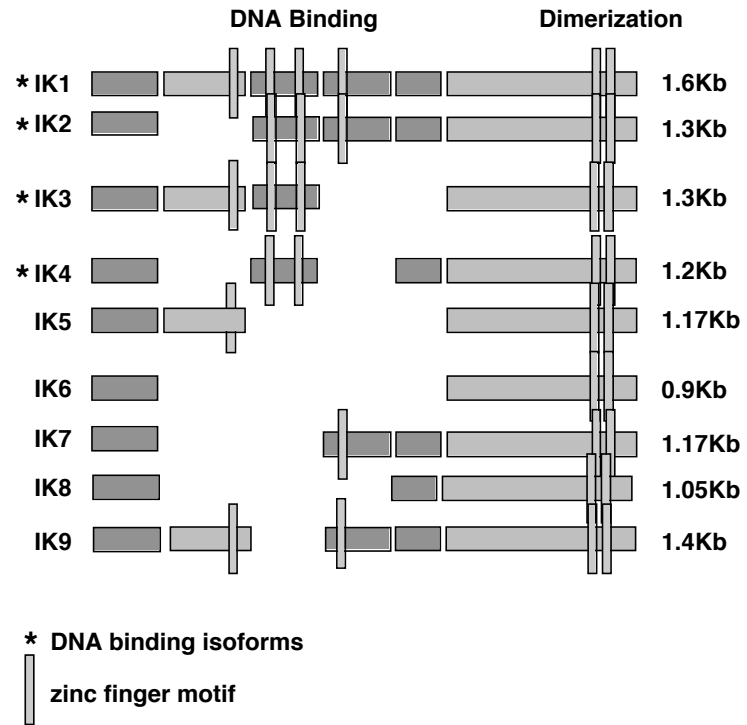

**Supplementary FIG. 1 Schematic representation of Ikaros isoforms.** Alternatively spliced isoforms of Ikaros RNA, including the size range of RNA.
