# Supplementary material
Source: PubMed Central journal article supplement (PMC1829386)
Supplement: 7601626s2.pdf [file 7601626s2.pdf]

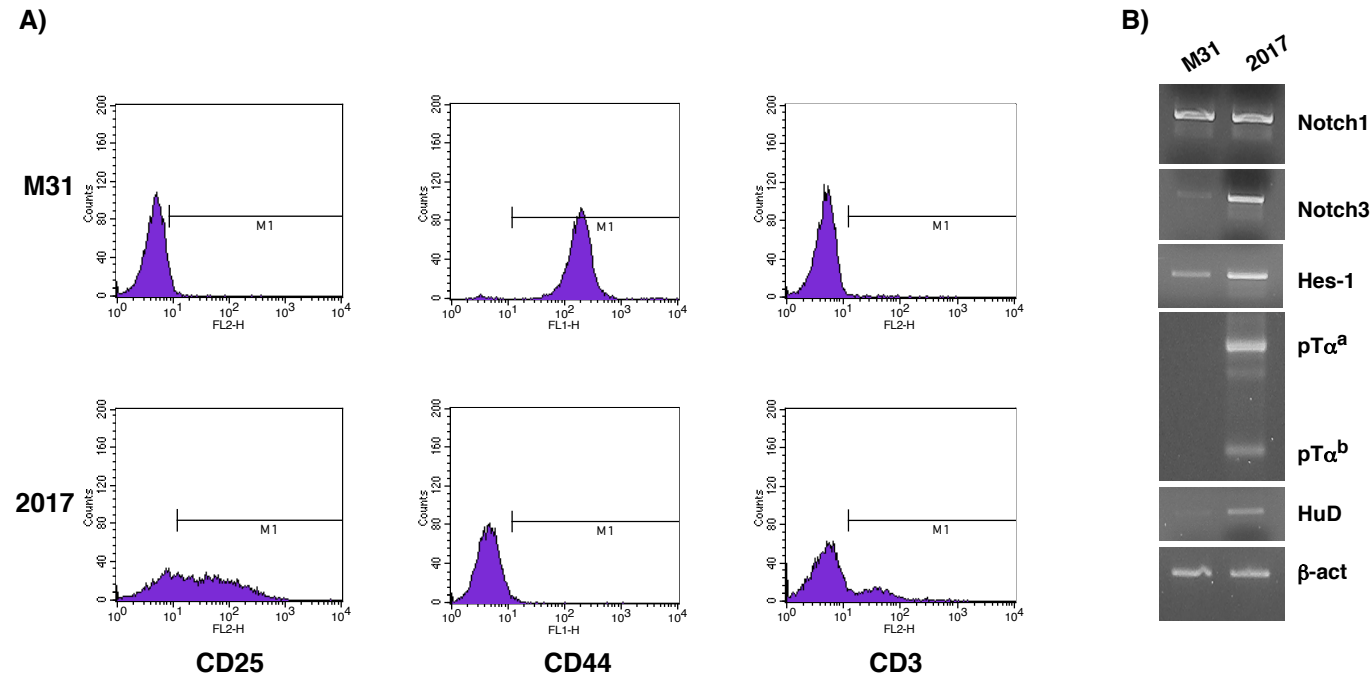

**Supplementary FIG. 1 M31 and 2017 cell line characterization.** (A) FCA analysis of CD44, CD25 and CD3 expression in the M31 and 2017 cell lines (B) mRNA expression profile of Notch1, Notch3, Hes1, pTα<sup>a</sup> and pTα<sup>b</sup> isoforms of pTα gene and HuD, assessed by RT-PCR in M31 and 2017 cell lines. Results were normalized to β-actin (β-act).
