# Supplementary material
Source: PubMed Central journal article supplement (PMC1829386)
Supplement: 7601626s3.pdf [file 7601626s3.pdf]

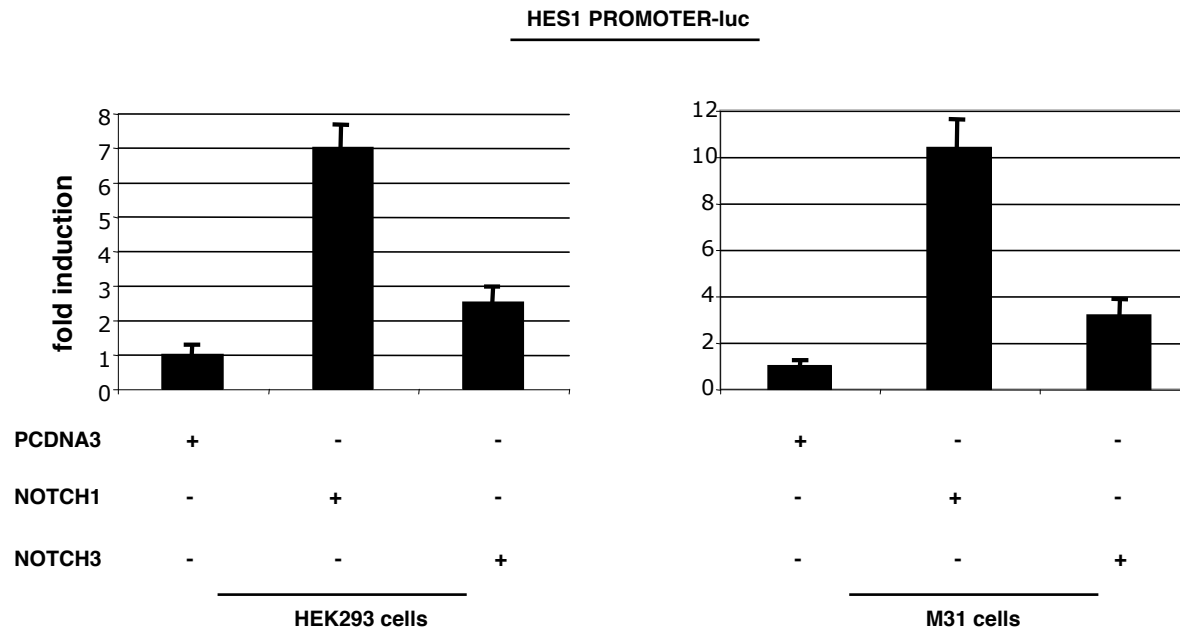

**Supplementary FIG. 3 Notch1 construct is more efficient than the Notch3 construct in activating the Hes-1 promoter.** Non lymphoid HEK293 and M31 thymocyte cell lines were transfected with a luciferase reporter construct containing the Hes1 promoter together with Notch1 or Notch3 expression vector. DNA contents in the different transfection assays were normalized with empty vector (pcDNA3). The data shown were collected from three independent experiments; vertical bars indicate standard deviation.
